# Supplementary material for: Controllable synthesis of Zn2GeO4:Eu nanocrystals with multi-color emission for white light-emitting diodes
Source: Royal Society of Chemistry journal article supplement (doi:10.1039/c5tc00844a), 2015-01-01
Supplement: c5tc00844a1.pdf [file c5tc00844a1.pdf]

## Supporting Information

**Fig. S1** EPR spectra of as-prepared  $\text{Zn}_2\text{GeO}_4:x\text{Eu}$  nanocrystals.

**Table R1** The QY of as-prepared  $\text{Zn}_2\text{GeO}_4:x\text{Eu}$  with different Eu-doped concentration.

**Table R2** The QY of as-prepared  $\text{Zn}_2\text{GeO}_4:0.15\text{Eu}$  with different excitation wavelengths.(the emission of samples excited at 318 nm and 350 nm are situated at the nearly central of white light region)

**Fig. S2** (a) and (b) SEM images of  $\text{Zn}_2\text{GeO}_4:0.05\text{Eu}$  nanocrystals calcined at 400°C and 600°C for 8h in air, respectively. (c) and (d) SEM images of  $\text{Zn}_2\text{GeO}_4:0.05\text{Eu}$  nanocrystals calcined at 400°C and 600°C for 8h in graphite crucible, respectively.

**Fig. S3** XPS spectra of  $\text{Zn}_2\text{GeO}_4:0.05\text{Eu}$  nanocrystals calcined at 600°C for 8h in air and graphite crucible, respectively.

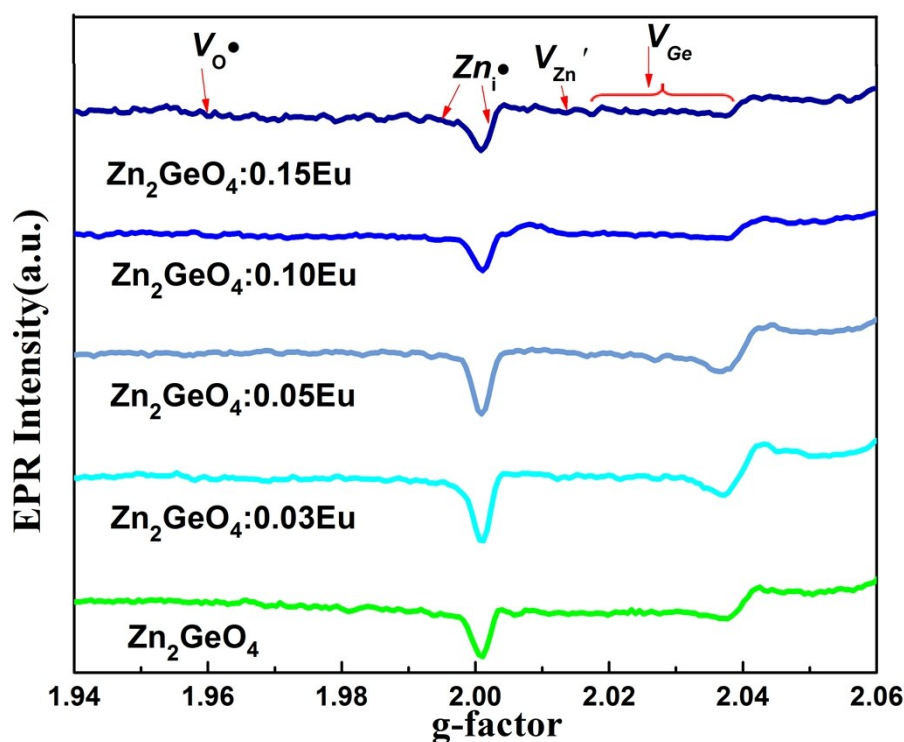

**Fig. S1** EPR spectra of as-prepared  $\text{Zn}_2\text{GeO}_4:x\text{Eu}$  nanocrystals.

**Table R1** The QY of as-prepared  $\text{Zn}_2\text{GeO}_4:x\text{Eu}$  with different Eu-doped concentration.

| $\text{Zn}_2\text{GeO}_4:x\text{Eu}(x)$ | 0  | 0.01 | 0.03 | 0.05 | 0.07 | 0.10 | 0.15 |
|-----------------------------------------|----|------|------|------|------|------|------|
| QY (%)                                  | 21 | 5    | 6    | 7    | 8    | 10   | 17   |

**Table R2** The QY of as-prepared  $\text{Zn}_2\text{GeO}_4:0.15\text{Eu}$  with different excitation wavelengths.  
(the emission of samples excited at 318 nm and 350 nm are situated at the nearly central of white light region)

| Excitation wavelengths(nm) | 265 | 318 | 350 |
|----------------------------|-----|-----|-----|
| QY (%)                     | 17  | 35  | 19  |

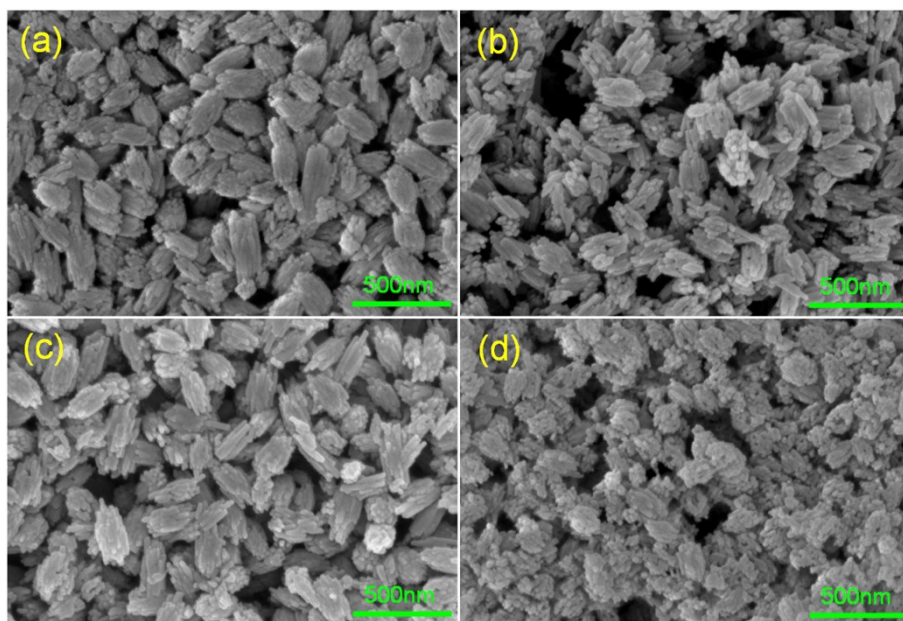

**Fig. S2** (a) and (b) SEM images of  $\text{Zn}_2\text{GeO}_4:0.05\text{Eu}$  nanocrystals calcined at 400°C and 600°C for 8h in air, respectively. (c) and (d) SEM images of  $\text{Zn}_2\text{GeO}_4:0.05\text{Eu}$  nanocrystals calcined at 400°C and 600°C for 8h in graphite crucible, respectively.

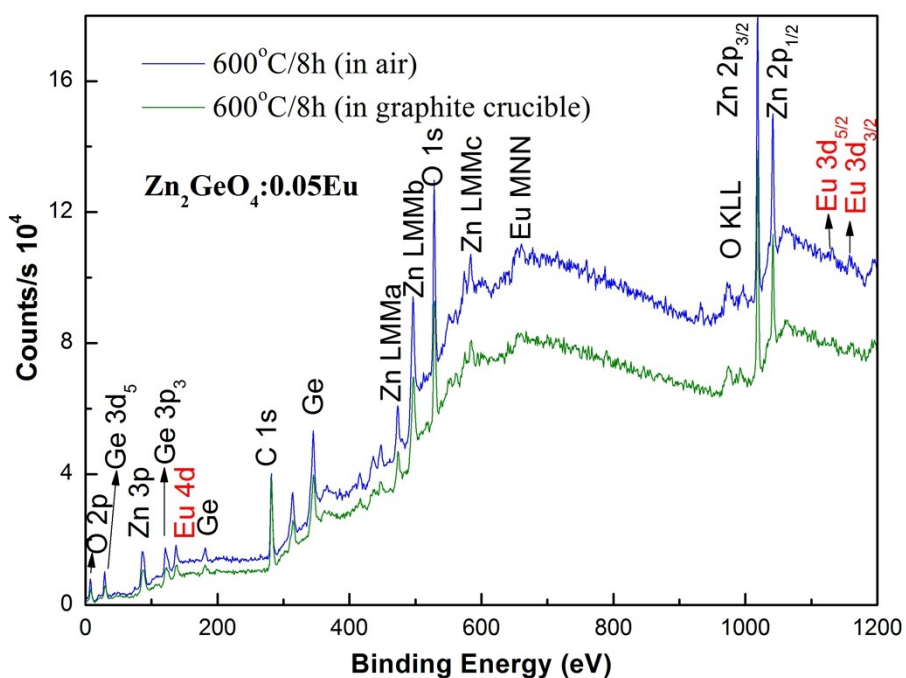

**Fig. S3** XPS spectra of  $\text{Zn}_2\text{GeO}_4:0.05\text{Eu}$  nanocrystals calcined at 600°C for 8h in air and graphite crucible, respectively.
